# Supplementary material for: Comparison of Nine Early Warning Scores for Identification of Short-Term Mortality in Acute Neurological Disease in Emergency Department
Source: MDPI journal article supplement (doi:10.3390/jpm12040630), 2022-04-14
Supplement: s1 [file s1]

**Supplementary Table S1.** AUROC, cut-off points for combined sensitivity and specificity with best score (Youden's test) for the different scales analyzed (for 7-, 14- and 21-day mortality).

| Scores              | Non-survivors 7-day | Non-survivors 14-day | Non-survivors 21-day |
|---------------------|---------------------|----------------------|----------------------|
| <b>NEWS</b>         |                     |                      |                      |
| Cut-off             | 6                   | 5                    | 5                    |
| AUROC               | 0.863 (0.820-0.907) | 0.849 (0.809-0.890)  | 0.820 (0.780-0.859)  |
| Sensitivity         | 79.8 (71.5-86.2)    | 86.2 (79.7-90.9)     | 81.5 (75.1-86.6)     |
| Specificity         | 77.3 (74.7-79.8)    | 68.9 (66.0-71.6)     | 69.6 (66.7-72.4)     |
| PPV                 | 27.7 (23.2-32.8)    | 28.3 (24.3-32.7)     | 32.0 (27.8-36.5)     |
| NPV                 | 97.2 (95.9-98.2)    | 97.2 (95.7-98.2)     | 95.5 (93.8-96.8)     |
| Likelihood ratio +  | 3.52 (3.05-4.07)    | 2.77 (2.47-3.10)     | 2.68 (2.38-3.02)     |
| Likelihood ratio -  | 0.26 (0.18-0.38)    | 0.20 (0.13-0.30)     | 0.27 (0.19-0.37)     |
| Odds ratio          | 13.51 (8.36-21.82)  | 13.83 (8.47-22.58)   | 10.09 (6.72-15.16)   |
| Diagnostic accuracy |                     | 71.0 (68.4-73.6)     | 71.4 (68.7-73.9)     |
| <b>ViEWS</b>        |                     |                      |                      |
| Cut-off             | 5                   | 5                    | 5                    |
| AUROC               | 0.862 (0.819-0.906) | 0.849 (0.809-0.889)  | 0.818 (0.778-0.857)  |
| Sensitivity         | 89.5 (82.5-93.9)    | 84.8 (78.1-89.8)     | 80.3 (73.8-85.6)     |
| Specificity         | 69.9 (67.0-72.6)    | 71.0 (68.2-73.7)     | 71.8 (68.9-74.6)     |
| PPV                 | 24.5 (20.6-28.8)    | 29.5 (25.3-34.0)     | 33.3 (29.0-38.0)     |
| NPV                 | 98.4 (97.2-99.1)    | 97.0 (95.6-98.0)     | 95.4 (93.7-96.7)     |
| Likelihood ratio +  | 2.97 (2.66-3.32)    | 2.93 (2.60-3.30)     | 2.85 (2.52-3.23)     |
| Likelihood ratio -  | 0.15 (0.09-0.26)    | 0.21 (0.14-0.32)     | 0.27 (0.20-0.37)     |
| Odds ratio          | 19.73 (10.69-36.40) | 13.71 (8.54-22.02)   | 10.43 (6.99-15.55)   |
| Diagnostic accuracy | 71.8 (69.2-74.3)    | 72.8 (70.1-75.2)     | 73.1 (70.5-75.6)     |
| <b>MEWS</b>         |                     |                      |                      |
| Cut-off             | 4                   | 3                    | 4                    |
| AUROC               | 0.860 (0.816-0.904) | 0.834 (0.793-0.876)  | 0.824 (0.784-0.863)  |
| Sensitivity         | 77.2 (68.7-83.9)    | 85.5 (78.9-90.3)     | 69.4 (62.1-75.8)     |
| Specificity         | 81.6 (79.2-83.9)    | 69.5 (66.6-72.2)     | 83.8 (81.4-86.0)     |
| PPV                 | 31.4 (26.3-37.1)    | 28.6 (24.5-33.0)     | 42.9 (37.2-48.7)     |
| NPV                 | 97.0 (95.7-98.0)    | 97.1 (95.6-98.1)     | 94.0 (92.2-95.4)     |
| Likelihood ratio +  | 4.21 (3.58-4.95)    | 2.80 (2.50-3.14)     | 4.28 (3.60-5.09)     |
| Likelihood ratio -  | 0.28 (0.20-0.39)    | 0.21 (0.14-0.31)     | 0.37 (0.29-0.46)     |
| Odds ratio          | 15.05 (9.46-23.96)  | 13.43 (8.30-21.73)   | 11.70 (8.12-16.86)   |
| Diagnostic accuracy | 81.2 (78.9-83.4)    | 71.5 (68.8-74.0)     | 81.6 (79.3-83.8)     |
| <b>MREMS</b>        |                     |                      |                      |
| Cut-off             | 8                   | 8                    | 8                    |
| AUROC               | 0.889 (0.849-0.929) | 0.882 (0.845-0.918)  | 0.866 (0.831-0.902)  |
| Sensitivity         | 71.1 (62.1-78.6)    | 69.0 (61.0-75.9)     | 63.6 (56.2-70.4)     |
| Specificity         | 89.3 (87.3-91.0)    | 90.8 (88.9-92.5)     | 91.6 (89.7-93.2)     |
| PPV                 | 42.0 (35.2-49.0)    | 51.8 (44.8-58.8)     | 57.0 (49.9-63.8)     |
| NPV                 | 96.6 (95.2-97.6)    | 95.3 (93.8-96.5)     | 93.5 (91.8-94.9)     |
| Likelihood ratio +  | 6.64 (5.38-8.19)    | 7.53 (6.03-9.40)     | 7.56 (5.98-9.56)     |
| Likelihood ratio -  | 0.32 (0.24-0.43)    | 0.34 (0.27-0.44)     | 0.40 (0.33-0.49)     |
| Odds ratio          | 20.47 (13.06-32.09) | 22.03 (14.60-33.24)  | 19.02 (12.97-27.88)  |
| Diagnostic accuracy | 87.5 (85.5-89.3)    | 88.1 (86.1-89.8)     | 87.4 (85.4-89.2)     |
| <b>EWS</b>          |                     |                      |                      |
| Cut-off             | 3                   | 3                    | 3                    |
| AUROC               | 0.851 (0.806-0.896) | 0.836 (0.794-0.877)  | 0.818 (0.779-0.858)  |
| Sensitivity         | 80.7 (72.5-86.9)    | 76.6 (69.0-82.7)     | 73.4 (66.4-79.4)     |
| Specificity         | 78.2 (75.6-80.6)    | 89.7 (87.5-91.5)     | 80.4 (77.9-82.8)     |
| PPV                 | 28.8 (24.1-33.9)    | 54.4 (47.6-61.1)     | 39.7 (34.5-45.1)     |
| NPV                 | 97.4 (96.1-98.3)    | 96.0 (94.4-97.1)     | 94.5 (92.8-95.9)     |
| Likelihood ratio +  | 3.70 (3.20-4.28)    | 7.40 (5.98-9.15)     | 3.75 (3.21-4.38)     |
| Likelihood ratio -  | 0.25 (0.17-0.36)    | 0.26 (0.19-0.35)     | 0.33 (0.26-0.43)     |
| Odds ratio          | 15.00 (9.21-24.44)  | 28.29 (18.22-43.94)  | 11.36 (7.83-16.48)   |
| Diagnostic accuracy | 78.4 (76.0-80.7)    | 87.8 (85.7-89.7)     | 79.4 (77.0-81.6)     |

|                     |                     |                     |                     |
|---------------------|---------------------|---------------------|---------------------|
| HEWS                |                     |                     |                     |
| Cut-off             | 4                   | 4                   | 4                   |
| AUROC               | 0.798 (0.748-0.848) | 0.790 (0.745-0.836) | 0.770 (0.727-0.813) |
| Sensitivity         | 77.2 (68.7-83.9)    | 75.9 (68.3-82.1)    | 71.7 (64.5-77.9)    |
| Specificity         | 68.6 (65.8-71.4)    | 77.2 (74.4-79.8)    | 70.4 (67.5-73.2)    |
| PPV                 | 21.2 (17.5-25.3)    | 34.5 (29.5-39.9)    | 29.8 (25.6-34.4)    |
| NPV                 | 96.5 (94.9-97.6)    | 95.3 (93.5-96.6)    | 93.4 (91.4-95.0)    |
| Likelihood ratio +  | 2.46 (2.15-2.82)    | 3.33 (2.87-3.87)    | 2.42 (2.12-2.77)    |
| Likelihood ratio -  | 0.33 (0.24-0.47)    | 0.31 (0.23-0.42)    | 0.40 (0.31-0.51)    |
| Odds ratio          | 7.41 (4.69-11.70)   | 10.66 (7.07-26.07)  | 6.02 (4.21-8.61)    |
| Diagnostic accuracy | 69.5 (66.8-72.1)    | 77.0 (74.4-79.5)    | 70.6 (67.9-73.2)    |
| SEWS                |                     |                     |                     |
| Cut-off             | 3                   | 3                   | 3                   |
| AUROC               | 0.851 (0.806-0.896) | 0.836 (0.794-0.877) | 0.818 (0.779-0.858) |
| Sensitivity         | 80.7 (72.5-86.9)    | 76.6 (69.0-82.7)    | 73.4 (66.4-79.4)    |
| Specificity         | 78.2 (75.6-80.6)    | 79.4 (76.8-81.8)    | 80.4 (77.9-82.8)    |
| PPV                 | 28.8 (24.1-33.9)    | 34.7 (29.7-40.1)    | 39.7 (34.5-45.1)    |
| NPV                 | 97.4 (96.1-98.3)    | 96.0 (94.4-97.1)    | 94.5 (92.8-95.9)    |
| Likelihood ratio +  | 3.70 (3.20-4.28)    | 3.72 (3.20-4.32)    | 3.75 (3.21-4.38)    |
| Likelihood ratio -  | 0.25 (0.17-0.36)    | 0.30 (0.22-0.40)    | 0.33 (0.26-0.43)    |
| Odds ratio          | 15.00 (9.21-24.44)  | 12.59 (8.33-19.03)  | 11.36 (7.83-16.48)  |
| Diagnostic accuracy | 78.4 (76.0-80.7)    | 79.1 (76.7-81.3)    | 79.4 (77.0-81.6)    |
| RAPS                |                     |                     |                     |
| Cut-off             | 3                   | 4                   | 3                   |
| AUROC               | 0.832 (0.785-0.879) | 0.821 (0.778-0.864) | 0.810 (0.770-0.851) |
| Sensitivity         | 82.5 (74.4-88.3)    | 70.3 (62.5-77.2)    | 78.0 (71.3-83.6)    |
| Specificity         | 69.4 (66.5-72.1)    | 80.3 (77.7-82.6)    | 71.7 (68.8-74.5)    |
| PPV                 | 22.7 (18.9-27.0)    | 33.8 (28.7-39.3)    | 32.6 (28.3-37.3)    |
| NPV                 | 97.3 (95.3-98.3)    | 95.0 (93.3-96.3)    | 94.9 (93.1-96.3)    |
| Likelihood ratio +  | 2.70 (2.38-3.05)    | 3.57 (3.03-4.20)    | 2.76 (2.43-3.13)    |
| Likelihood ratio -  | 0.25 (0.17-0.38)    | 0.37 (0.29-0.48)    | 0.31 (0.23-0.41)    |
| Odds ratio          | 10.66 (6.47-17.58)  | 9.67 (6.55-14.26)   | 9.02 (6.13-13.26)   |
| Diagnostic accuracy | 70.7 (68.0-73.2)    | 79.1 (76.6-81.3)    | 72.7 (70.0-75.2)    |
| WPSS                |                     |                     |                     |
| Cut-off             | 3                   | 3                   | 3                   |
| AUROC               | 0.825 (0.777-0.873) | 0.817 (0.774-0.860) | 0.790 (0.748-0.831) |
| Sensitivity         | 95.6 (90.1-98.1)    | 93.8 (88.6-96.7)    | 90.2 (84.8-93.8)    |
| Specificity         | 55.8 (52.8-58.8)    | 57.1 (54.1-60.2)    | 58.0 (54.8-61.0)    |
| PPV                 | 19.1 (16.1-22.5)    | 23.8 (20.5-27.5)    | 27.3 (23.8-31.1)    |
| NPV                 | 99.2 (98.0-99.6)    | 98.5 (97.1-99.2)    | 97.1 (95.4-98.2)    |
| Likelihood ratio +  | 2.16 (2.00-2.34)    | 2.19 (2.02-2.38)    | 2.14 (1.96-2.34)    |
| Likelihood ratio -  | 0.08 (0.03-0.19)    | 0.11 (0.06-0.21)    | 0.17 (0.11-0.27)    |
| Odds ratio          | 27.56 (11.15-68.10) | 20.15 (10.15-40.01) | 12.65 (7.55-21.20)  |
| Diagnostic accuracy | 59.7 (56.9-62.5)    | 61.7 (58.9-64.5)    | 62.8 (59.9-65.5)    |

Bracketed numbers indicate 95% confidence interval. NEWS: National Early Warning Score; ViEWS: Vital PAC Early Warning Score; MEWS: Modified Early Warning Score; MREWS: Modified Rapid Emergency Medicine Score; EWS: Early Warning Score; HEWS: Hamilton Early Warning Score; SEWS: Standardised Early Warning Score; RAPS: Rapid Acute Physiology Score; WPSS: WHO Prognostic Scored System; AUROC: area under the receiver operating characteristics; PPV: positive predictive value; NPV: negative predictive value.

**Supplementary Table S2.** Comparison of the AUROC of the different scores (ICU admissions)

| Scores | NEWS         | ViEWS        | MEWS         | MREMS        | EWS          | HEWS         | SEWS         | RAPS         | WPSS         |
|--------|--------------|--------------|--------------|--------------|--------------|--------------|--------------|--------------|--------------|
| NEWS   | 1            | 0.713        | 0.059        | 0.463        | 0.634        | <b>0.005</b> | 0.636        | 0.251        | <b>0.000</b> |
| ViEWS  | 0.713        | 1            | <b>0.046</b> | 0.500        | 0.562        | <b>0.007</b> | 0.564        | 0.233        | <b>0.000</b> |
| MEWS   | 0.059        | <b>0.046</b> | 1            | <b>0.033</b> | <b>0.033</b> | <b>0.000</b> | <b>0.033</b> | 0.964        | <b>0.000</b> |
| MREMS  | 0.463        | 0.500        | <b>0.033</b> | 1            | 0.241        | 0.131        | 0.241        | <b>0.001</b> | <b>0.046</b> |
| EWS    | 0.634        | 0.562        | <b>0.033</b> | 0.241        | 1            | <b>0.000</b> | 0.387        | 0.286        | <b>0.000</b> |
| HEWS   | <b>0.005</b> | <b>0.007</b> | <b>0.000</b> | 0.131        | <b>0.000</b> | 1            | <b>0.000</b> | <b>0.000</b> | 0.431        |
| SEWS   | 0.636        | 0.564        | <b>0.033</b> | 0.241        | 0.387        | <b>0.000</b> | 1            | 0.285        | <b>0.000</b> |
| RAPS   | 0.251        | 0.233        | 0.964        | <b>0.001</b> | 0.286        | <b>0.000</b> | 0.285        | 1            | <b>0.000</b> |
| WPSS   | <b>0.000</b> | <b>0.000</b> | <b>0.000</b> | <b>0.046</b> | <b>0.000</b> | 0.431        | <b>0.000</b> | <b>0.000</b> | 1            |

NEWS: National Early Warning Score; ViEWS: Vital PAC Early Warning Score; MEWS: Modified Early Warning Score; MREMS: Modified Rapid Emergency Medicine Score; EWS: Early Warning Score; HEWS: Hamilton Early Warning Score; SEWS: Standardised Early Warning Score; RAPS: Rapid Acute Physiology Score; WPSS: WHO Prognostic Scored System.  
 Values in bold differ from 0 with a significance level of alpha = 0.05.

**Supplementary Table S3.** Comparison of the AUROC of the different scores (2-day mortality)

| Scores | NEWS         | ViEWS        | MEWS         | MREMS        | EWS          | HEWS         | SEWS         | RAPS         | WPSS         |
|--------|--------------|--------------|--------------|--------------|--------------|--------------|--------------|--------------|--------------|
| NEWS   | 1            | 0.777        | 0.619        | 0.215        | 0.350        | <b>0.011</b> | 0.349        | 0.781        | <b>0.000</b> |
| ViEWS  | 0.777        | 1            | 0.574        | 0.201        | 0.414        | <b>0.013</b> | 0.414        | 0.828        | <b>0.000</b> |
| MEWS   | 0.619        | 0.574        | 1            | 0.273        | <b>0.019</b> | <b>0.001</b> | <b>0.019</b> | 0.499        | <b>0.000</b> |
| MREMS  | 0.215        | 0.201        | 0.273        | 1            | <b>0.030</b> | <b>0.002</b> | <b>0.030</b> | <b>0.025</b> | <b>0.000</b> |
| EWS    | 0.350        | 0.414        | <b>0.019</b> | <b>0.030</b> | 1            | <b>0.023</b> | 0.522        | 0.702        | <b>0.006</b> |
| HEWS   | <b>0.011</b> | <b>0.013</b> | <b>0.001</b> | <b>0.002</b> | <b>0.023</b> | 1            | <b>0.023</b> | 0.085        | 0.321        |
| SEWS   | 0.349        | 0.414        | <b>0.019</b> | <b>0.030</b> | 0.522        | <b>0.023</b> | 1            | 0.701        | <b>0.006</b> |
| RAPS   | 0.781        | 0.828        | 0.499        | <b>0.025</b> | 0.702        | 0.085        | 0.701        | 1            | <b>0.032</b> |
| WPSS   | <b>0.000</b> | <b>0.000</b> | <b>0.000</b> | <b>0.000</b> | <b>0.006</b> | 0.321        | <b>0.006</b> | <b>0.032</b> | 1            |

NEWS: National Early Warning Score; ViEWS: Vital PAC Early Warning Score; MEWS: Modified Early Warning Score; MREMS: Modified Rapid Emergency Medicine Score; EWS: Early Warning Score; HEWS: Hamilton Early Warning Score; SEWS: Standardised Early Warning Score; RAPS: Rapid Acute Physiology Score; WPSS: WHO Prognostic Scored System.  
Values in bold differ from 0 with a significance level of alpha = 0.05.
